# Supplementary material for: Modulation of Pro-Inflammatory IL-6 Trans-Signaling Axis by Splice Switching Oligonucleotides as a Therapeutic Modality in Inflammation
Source: MDPI journal article supplement (doi:10.3390/cells12182285), 2023-09-15
Supplement: s1 [file s1]

Supplementary information

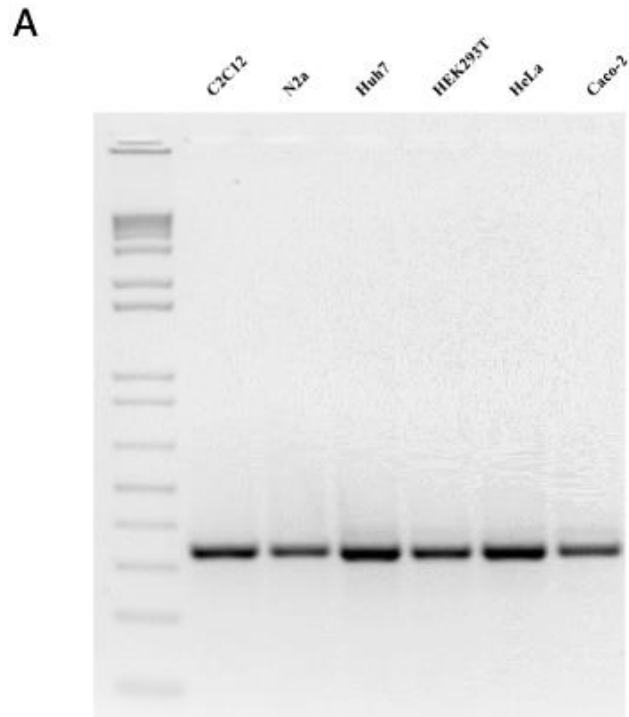

Figure S1: Expression of Gp130 RNA was checked in mouse C2C12, mouse N2A, human Huh7, human HEK293T, human HeLa, and human Caco-2. 2% Agarose gel image showing total RNA RT-PCR using primers targeting exon 8 and exon 10 of Gp130, where the 198 bp band corresponds to the Gp130 isoform with no exon skipping in this region.

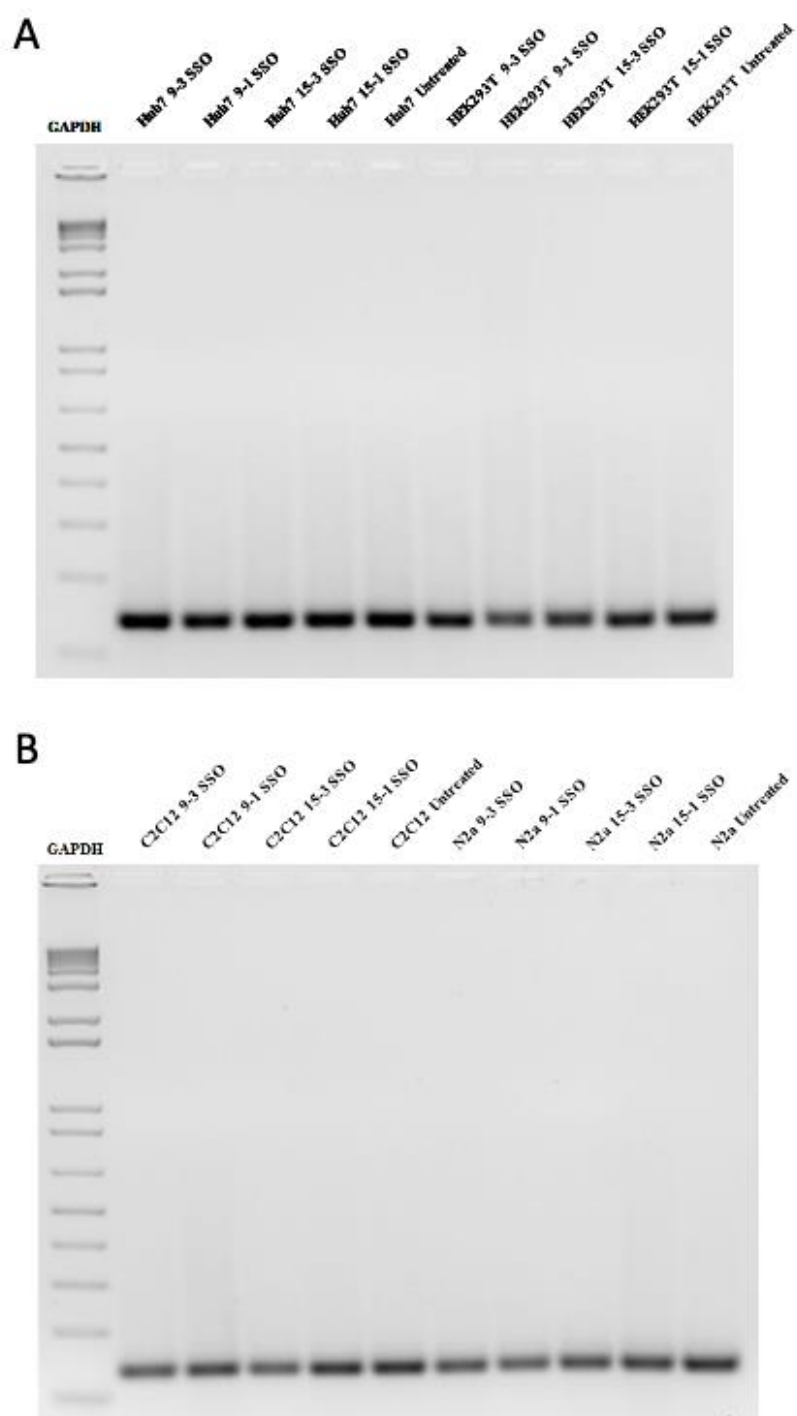

Figure S2: RT-PCR showing amplification of GAPDH mRNA in RNA samples from cells treated with different SSOs.

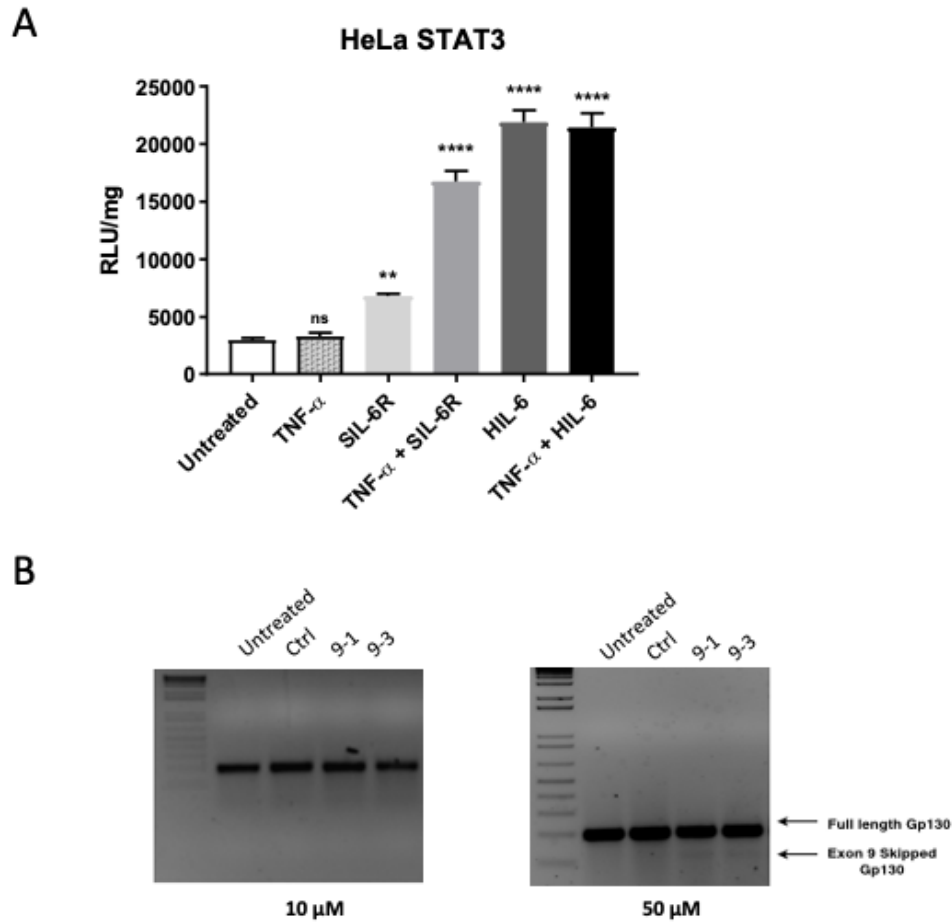

Figure S3: A) Relative Light Unit RLU/mg protein in HeLa STAT3 Luciferase reporter cell line, induced by 5ng/ml TNF $\alpha$ , 20 ng/ml SIL-6R and/or 10ng/ml HIL-6. Statistical analysis was done with One-Way ANOVA and Dunnett's multiple comparisons test. Data represent mean + SD of three replicates. \*\*\*\* ( $P < 0.0001$ ), \*\* ( $P < 0.001$ ), ns ( $P > 0.05$ ) – not significant, versus untreated. B) Gymnotic delivery of PMO-modified Exon 9 SSOs showed modest exon skipping in mouse N2A cells. RT-PCR showing exon 9 skipping efficiency of Gp130 mRNA in RNA samples.
